# Supplementary material for: A model study on the photochemical isomerization of isothiazoles and thiazoles
Source: Royal Society of Chemistry journal article supplement (doi:10.1039/c4cp01895h), 2014-01-01
Supplement: c4cp01895h1.pdf [file c4cp01895h1.pdf]

# Supporting Information

## A Model Study on the Photochemical Isomerizations of Isothiazoles and Thiazoles

Ming-Der Su\*

<sup>1</sup>Department of Applied Chemistry, National Chiayi University, Chiayi 60004,  
Taiwan

<sup>2</sup>Department of Medicinal and Applied Chemistry, Kaohsiung Medical  
University, Kaohsiung 80708, Taiwan

Email: [midesu@mail.ncyu.edu.tw](mailto:midesu@mail.ncyu.edu.tw)

Details of the present computational approach are as follows:

All the geometries were fully optimized at the CAS(10,7)/6-311G(d) level of theory. To correct the energetics for dynamic electron correlation, we have used the MP2-CAS-(10,7)/6-311++G(3df,3pd) level of theory. The CASSCF calculations were performed using the MCSCF program released in GAUSSIAN 09. See (1).

(1) Frisch, M. J.; Trucks, G. W.; Schlegel, H. B.; Scuseria, G. E.; Robb, M. A.; Cheeseman, J. R.; Zakrzewski, V. G.; Montgomery, Jr., J. A.; Stratmann, R. E.; Burant, J. C.; Dapprich, S.; Millam, J. M.; Daniels, A. D.; Kudin, K. N.; Strain, M. C.; Farkas, O.; Tomasi, J.; Barone, V.; Cossi, M.; Cammi, R.; Mennucci, B.; Pomelli, C.; Adamo, C.; Clifford, S.; Ochterski, J.; Petersson, G. A.; Ayala, P. Y.; Cui, Q.; Morokuma, K.; Malick, D. K.; Rabuck, A. D.; Raghavachari, K.; Foresman, J. B.; Cioslowski, J.; Ortiz, J. V.; Baboul, A. G.; Stefanov, B. B.; Liu, Liashenko, G.; Piskorz, A.; Komaromi, P.; I.; Gomperts, R.; Martin, R. L.; Fox, D. J.; Keith, T.; Al-Laham, M. A.; Peng, C. Y.; Nanayakkara, A.; Gonzalez, C.; Challacombe, M.; Gill, P. M. W.; Johnson, B.; Chen, W.; Wong, M. W.; Andres, J. L.; Gonzalez, C.; Head-Gordon, M.; Replogle, E. S. and Pople, J. A. Gaussian, Inc., Wallingford CT, 2013.

### 3-methylisothiazole (Rea-1)

---

| Atomic<br>Number | Coordinates (Angstroms) |           |           |
|------------------|-------------------------|-----------|-----------|
|                  | X                       | Y         | Z         |
| 16               | 0.032654                | -0.174519 | 1.403115  |
| 6                | 1.064125                | 0.026560  | 0.034614  |
| 1                | 2.129506                | 0.083317  | 0.128270  |
| 6                | 0.311864                | 0.091055  | -1.089612 |
| 7                | -1.362769               | -0.172982 | 0.493874  |
| 6                | -1.093406               | -0.030053 | -0.767473 |
| 6                | -2.195040               | 0.010521  | -1.787401 |
| 1                | -2.239428               | 0.983022  | -2.267170 |
| 1                | -3.146911               | -0.183679 | -1.314071 |
| 1                | -2.032766               | -0.731303 | -2.562370 |
| 1                | 0.695623                | 0.213919  | -2.083831 |

---

Hartree Fock Energies = -606.43657

MP2 Energies = -607.6832613

---

### CI-1-A

---

| Atomic<br>Number | Coordinates (Angstroms) |           |           |
|------------------|-------------------------|-----------|-----------|
|                  | X                       | Y         | Z         |
| 7                | -0.014867               | -1.166527 | 0.071267  |
| 6                | -1.090199               | -0.551890 | -0.344702 |
| 16               | 1.243653                | -0.417691 | -0.840933 |
| 6                | -0.843765               | 0.820910  | 0.182230  |
| 6                | 0.456257                | 1.072050  | -0.156957 |
| 6                | -1.805383               | -0.778535 | -1.653799 |
| 1                | 0.996456                | 1.993561  | -0.034474 |
| 1                | -1.530716               | 1.561114  | 0.547975  |
| 1                | -1.267376               | -1.516544 | -2.237732 |
| 1                | -1.931113               | 0.130067  | -2.231575 |
| 1                | -2.794589               | -1.180290 | -1.451608 |

---

#### Derivative Coupling

|    |               |               |               |
|----|---------------|---------------|---------------|
| -1 | -0.0310287131 | -0.0202233166 | -0.0554178334 |
| -2 | 0.0597158069  | 0.0030484279  | 0.0208411261  |
| -3 | -0.0130175371 | 0.0065421395  | 0.0372905014  |
| -4 | -0.0016745249 | 0.0106968801  | -0.0123703740 |
| -5 | 0.0054888949  | 0.0118031498  | -0.0022897606 |
| -6 | -0.0182238651 | -0.0159063550 | 0.0104141795  |
| -7 | -0.0017296894 | 0.0006250330  | -0.0010743947 |
| -8 | -0.0001339308 | 0.0010751756  | -0.0011688505 |

|                     |               |               |               |
|---------------------|---------------|---------------|---------------|
| -9                  | 0.0007838073  | 0.0010017061  | 0.0030338442  |
| -10                 | 0.0019744088  | 0.0013203719  | 0.0049124434  |
| -11                 | -0.0021546574 | 0.0000167876  | -0.0041708815 |
| Gradient.Difference |               |               |               |
| -1                  | 0.0717501413  | -0.0934716878 | -0.0112427922 |
| -2                  | -0.1021068283 | 0.0548981900  | 0.0145342509  |
| -3                  | 0.0099696717  | 0.0225789662  | 0.0245822083  |
| -4                  | 0.0311072882  | 0.0156426987  | -0.0306303808 |
| -5                  | -0.0099918824 | 0.0197276474  | 0.0012890850  |
| -6                  | -0.0029512600 | -0.0148657952 | 0.0068992320  |
| -7                  | 0.0016384801  | -0.0033089314 | -0.0001833584 |
| -8                  | -0.0013411360 | -0.0034124740 | -0.0003934690 |
| -9                  | -0.0021498061 | 0.0018561942  | -0.0033947312 |
| -10                 | 0.0042725689  | -0.0000299633 | 0.0014756992  |
| -11                 | -0.0001972373 | 0.0003851553  | -0.0029357436 |

Hartree Fock Energies = -606.2417858

MP2 Energies = -607.5008909

### Int-1

| Atomic<br>Number | Coordinates (Angstroms) |           |           |
|------------------|-------------------------|-----------|-----------|
|                  | X                       | Y         | Z         |
| 16               | 0.000000                | 0.000000  | 0.000000  |
| 6                | 0.000000                | 0.000000  | 1.811260  |
| 1                | 0.875909                | 0.000000  | 2.425260  |
| 6                | -1.308120               | -0.027576 | 2.047053  |
| 7                | -1.485501               | -1.093030 | -0.126799 |
| 6                | -1.866557               | -0.073494 | 0.612284  |
| 6                | -2.901029               | 0.935418  | 0.211146  |
| 1                | -3.871094               | 0.497235  | 0.436187  |
| 1                | -2.808036               | 1.876243  | 0.782420  |
| 1                | -2.854191               | 1.128231  | -0.850511 |
| 1                | -1.861289               | -0.111301 | 2.962512  |

Hartree Fock Energies = -606.28311

MP2 Energies = -607.562553496

### TS-1

| Atomic<br>Number | Coordinates (Angstroms) |           |           |
|------------------|-------------------------|-----------|-----------|
|                  | X                       | Y         | Z         |
| 16               | 0.000000                | 0.000000  | 0.000000  |
| 6                | 0.000000                | 0.000000  | 1.786853  |
| 1                | 0.867228                | 0.000000  | 2.414493  |
| 6                | -1.306431               | -0.138850 | 1.990376  |
| 7                | -1.669572               | -1.419898 | -0.179419 |
| 6                | -1.821272               | -0.231739 | 0.537745  |
| 6                | -2.849690               | 0.782081  | 0.098711  |
| 1                | -3.817965               | 0.486084  | 0.494983  |

S4

|   |           |           |           |
|---|-----------|-----------|-----------|
| 1 | -2.620964 | 1.773499  | 0.470437  |
| 1 | -2.919863 | 0.801101  | -0.979782 |
| 1 | -1.876631 | -0.233067 | 2.895299  |

---

|                |           |       |       |
|----------------|-----------|-------|-------|
|                | 1         |       |       |
|                | A         |       |       |
| Frequencies -- | -120.2037 |       |       |
| Red. masses -- | 7.1009    |       |       |
| Frc consts --  | 0.4842    |       |       |
| IR Inten --    | 0.0000    |       |       |
| -1             | 0.04      | 0.19  | 0.04  |
| -2             | 0.02      | 0.14  | 0.03  |
| -3             | -0.01     | 0.31  | 0.06  |
| -4             | 0.03      | -0.16 | -0.04 |
| -5             | -0.49     | -0.35 | 0.02  |
| -6             | 0.13      | -0.11 | -0.06 |
| -7             | 0.23      | 0.02  | -0.04 |
| -8             | 0.18      | 0.20  | -0.01 |
| -9             | 0.41      | -0.01 | -0.08 |
| -10            | 0.20      | 0.02  | -0.04 |
| -11            | 0.01      | -0.27 | -0.07 |

Hartree Fock Energies = -606.2643104

MP2 Energies = -607.540176496

---

## Int-2

---

| Atomic<br>Number | Coordinates (Angstroms) |           |           |
|------------------|-------------------------|-----------|-----------|
|                  | X                       | Y         | Z         |
| 6                | 0.000000                | 0.000000  | 0.000000  |
| 6                | 0.000000                | 0.000000  | 1.460998  |
| 6                | 1.459335                | 0.000000  | 1.318230  |
| 16               | 1.542664                | -0.909789 | -0.263189 |
| 1                | -0.811082               | 0.158632  | -0.681728 |
| 1                | -0.719739               | -0.016735 | 2.253679  |
| 6                | 2.529321                | 0.195672  | 2.339331  |
| 1                | 2.176701                | 0.867702  | 3.113768  |
| 1                | 2.799003                | -0.748614 | 2.797936  |
| 1                | 3.412738                | 0.628857  | 1.887162  |
| 7                | 0.581603                | 1.151924  | 0.818742  |

Hartree Fock Energies = -606.3156775

MP2 Energies = -607.6003051

---

## TS-2

---

| Atomic | Coordinates (Angstroms) |
|--------|-------------------------|
|--------|-------------------------|

| Number | X         | Y         | Z        |
|--------|-----------|-----------|----------|
| 16     | 0.239388  | -0.335732 | 0.142955 |
| 6      | -0.343882 | 0.119499  | 1.769259 |
| 6      | 1.836193  | 0.091729  | 0.879402 |
| 6      | 1.634441  | 1.322815  | 1.773078 |
| 6      | 0.412662  | 1.334130  | 2.263556 |
| 1      | 2.451443  | -0.717461 | 1.238349 |
| 1      | 2.414364  | 2.041595  | 1.944121 |
| 1      | -0.482126 | -0.689232 | 2.472776 |
| 6      | -0.233519 | 2.323275  | 3.182826 |
| 1      | 0.446051  | 3.130071  | 3.430514 |
| 1      | -0.546251 | 1.845075  | 4.107357 |
| 1      | -1.122101 | 2.746957  | 2.723261 |

| 1              |           |       |       |
|----------------|-----------|-------|-------|
| A              |           |       |       |
| Frequencies -- | -426.1162 |       |       |
| Red. masses -- | 2.3817    |       |       |
| Frc consts --  | 0.2548    |       |       |
| IR Inten --    | 0.0000    |       |       |
| -1             | 0.03      | -0.05 | 0.06  |
| -2             | -0.19     | 0.12  | -0.03 |
| -3             | 0.12      | 0.12  | -0.14 |
| -4             | 0.00      | -0.07 | 0.02  |
| -5             | -0.03     | -0.05 | 0.00  |
| -6             | 0.41      | 0.20  | -0.47 |
| -7             | -0.01     | -0.09 | 0.17  |
| -8             | -0.61     | 0.19  | -0.04 |
| -9             | 0.03      | -0.02 | 0.02  |
| -10            | 0.06      | -0.04 | 0.02  |
| -11            | 0.00      | 0.00  | 0.01  |
| -12            | 0.05      | 0.02  | 0.01  |

Hartree Fock Energies = -606.2992933

MP2 Energies = -607.5504956

### Int-3

| Atomic Number | Coordinates (Angstroms) |           |           |
|---------------|-------------------------|-----------|-----------|
|               | X                       | Y         | Z         |
| 16            | 0.109781                | 0.086736  | 1.435380  |
| 6             | 1.226924                | 0.006462  | 0.101628  |
| 1             | 2.286490                | 0.038722  | 0.218871  |
| 6             | 0.414870                | -0.050093 | -1.115882 |
| 7             | -1.306516               | -0.006413 | 0.582403  |
| 6             | -1.001126               | -0.083504 | -0.792587 |
| 6             | -2.121449               | 0.018474  | -1.766962 |
| 1             | -2.456498               | 1.049887  | -1.873597 |
| 1             | -2.970702               | -0.563888 | -1.427243 |
| 1             | -1.822356               | -0.338138 | -2.746790 |

1 0.804327 -0.060193 -2.112062

Hartree Fock Energies = -606.22343521

MP2 Energies = -607.4693847

### TS-3

| Atomic<br>Number | Coordinates (Angstroms) |           |           |
|------------------|-------------------------|-----------|-----------|
|                  | X                       | Y         | Z         |
| 16               | 0.000000                | 0.000000  | 0.000000  |
| 7                | 0.000000                | 0.000000  | 1.844594  |
| 6                | 1.142065                | 0.000000  | 2.365784  |
| 6                | 2.343151                | 0.005095  | 1.474255  |
| 6                | 1.987424                | -0.082272 | 0.198613  |
| 1                | 3.338704                | 0.065825  | 1.877819  |
| 1                | 2.578313                | -0.089712 | -0.696267 |
| 6                | 1.324119                | -0.007963 | 3.853489  |
| 1                | 1.888951                | 0.867624  | 4.160799  |
| 1                | 1.895022                | -0.882245 | 4.153000  |
| 1                | 0.368727                | -0.013201 | 4.355106  |

1  
A  
Frequencies -- -1144.8381  
Red. masses -- 7.6366  
Frc consts -- 1.7548  
IR Inten -- 0.0000  
-1 0.24 -0.02 -0.17  
-2 -0.01 0.00 0.35  
-3 -0.04 0.02 0.11  
-4 -0.09 -0.01 -0.07  
-5 -0.50 0.06 -0.01  
-6 -0.01 -0.21 -0.31  
-7 -0.59 0.00 -0.07  
-8 0.05 0.00 0.04  
-9 0.03 0.00 0.08  
-10 0.03 -0.01 0.08  
-11 0.03 -0.01 -0.01

Hartree Fock Energies = -606.2108551

MP2 Energies = -607.4454028

### CI-1-B

| Atomic<br>Number | Coordinates (Angstroms) |           |          |
|------------------|-------------------------|-----------|----------|
|                  | X                       | Y         | Z        |
| 16               | 1.135152                | 0.090072  | 0.709603 |
| 6                | 0.263126                | -0.206086 | 2.414214 |
| 1                | 0.788761                | 0.184582  | 3.268314 |
| 6                | -0.989260               | 0.431593  | 1.981812 |

S7

|   |           |           |          |
|---|-----------|-----------|----------|
| 7 | -1.361924 | -0.059807 | 0.546717 |
| 6 | -2.125504 | -0.314506 | 1.491890 |
| 6 | -3.446617 | -0.928528 | 1.768503 |
| 1 | -3.859327 | -1.341852 | 0.857921 |
| 1 | -4.126922 | -0.185568 | 2.167557 |
| 1 | -3.338528 | -1.715431 | 2.504771 |
| 1 | -1.056003 | 1.500859  | 2.114276 |

-----  
Derivative.Coupling

|     |               |               |               |
|-----|---------------|---------------|---------------|
| -1  | -0.0056417401 | 0.0013959451  | -0.0053486281 |
| -2  | 0.0002657428  | -0.0082626654 | 0.0115884699  |
| -3  | -0.0016352432 | 0.0046684545  | -0.0015184410 |
| -4  | 0.0022845778  | -0.0011540443 | -0.0017158515 |
| -5  | 0.0021457845  | 0.0037381425  | -0.0028624443 |
| -6  | 0.0015297064  | 0.0001639875  | 0.0007519343  |
| -7  | 0.0001976671  | -0.0005825556 | -0.0001374855 |
| -8  | 0.0000141819  | -0.0000135491 | 0.0000410774  |
| -9  | 0.0001619579  | 0.0000766439  | -0.0000641869 |
| -10 | -0.0000673964 | 0.0000250541  | -0.0001033651 |
| -11 | 0.0007447614  | -0.0000554131 | -0.0006310792 |

Gradient.Difference

|     |               |               |               |
|-----|---------------|---------------|---------------|
| -1  | 0.0197229133  | -0.0143254056 | 0.0334825334  |
| -2  | 0.0235974049  | 0.0202592187  | -0.0404642010 |
| -3  | 0.0006265095  | -0.0041863556 | 0.0012173015  |
| -4  | -0.0204608759 | -0.0072738433 | -0.0096275327 |
| -5  | -0.0167871331 | 0.0112638465  | 0.0109705580  |
| -6  | -0.0072434530 | -0.0014742860 | 0.0018507374  |
| -7  | 0.0013380536  | -0.0027117710 | 0.0012574759  |
| -8  | -0.0001954604 | -0.0001204308 | -0.0000454081 |
| -9  | 0.0002125963  | 0.0001782404  | -0.0000657384 |
| -10 | -0.0010872125 | -0.0005334363 | 0.0002167299  |
| -11 | 0.0002766573  | -0.0010757769 | 0.0012075441  |

Hartree Fock Energies = -606.2492028

MP2 Energies = -607.5320806

-----  
**Int-4**

| Atomic<br>Number | Coordinates (Angstroms) |           |          |
|------------------|-------------------------|-----------|----------|
|                  | X                       | Y         | Z        |
| 1                | 0.000000                | 0.000000  | 0.000000 |
| 6                | 0.000000                | 0.000000  | 1.080153 |
| 6                | 1.336700                | 0.000000  | 1.703031 |
| 16               | -1.409575               | -0.005800 | 1.885654 |
| 1                | 1.373266                | -0.296120 | 2.736828 |
| 6                | 2.432960                | 0.761248  | 1.125421 |
| 7                | 2.501568                | -0.441934 | 0.831856 |
| 6                | 3.107002                | 2.069539  | 0.942198 |
| 1                | 4.030516                | 1.932054  | 0.395227 |
| 1                | 3.320169                | 2.520573  | 1.903398 |
| 1                | 2.465436                | 2.746812  | 0.391079 |



-----  
Hartree Fock Energies = -606.37895  
MP2 Energies = -607.638803  
-----

**TS-4**

| Atomic<br>Number | Coordinates (Angstroms) |           |           |
|------------------|-------------------------|-----------|-----------|
|                  | X                       | Y         | Z         |
| 16               | 0.000000                | 0.000000  | 0.000000  |
| 6                | 0.000000                | 0.000000  | 1.697948  |
| 1                | 0.954272                | 0.000000  | 2.207428  |
| 6                | -1.010307               | 0.043117  | 2.577708  |
| 7                | -2.544660               | -0.194563 | 2.079715  |
| 6                | -2.519069               | 0.822113  | 1.498838  |
| 6                | -2.657424               | 2.111869  | 0.821028  |
| 1                | -3.134240               | 1.947519  | -0.135109 |
| 1                | -3.239391               | 2.784822  | 1.434571  |
| 1                | -1.665322               | 2.499722  | 0.642432  |
| 1                | -1.044323               | 0.143050  | 3.636972  |

-----  
1  
A  
Frequencies -- -479.5189  
Red. masses -- 3.3823  
Frc consts -- 0.0046  
IR Inten -- 0.0000  
-1 0.02 -0.02 0.00  
-2 -0.03 0.03 -0.08  
-3 -0.06 -0.03 -0.02  
-4 -0.21 0.33 -0.18  
-5 -0.20 -0.23 -0.06  
-6 0.34 -0.01 0.24  
-7 0.10 -0.05 0.10  
-8 -0.04 -0.24 0.20  
-9 0.08 -0.07 0.10  
-10 -0.01 0.12 -0.11  
-11 -0.16 0.55 -0.20

Hartree Fock Energies -606.3320194  
MP2 Energies = -607.5846164  
-----

**CI-1-C**

| Atomic<br>Number | Coordinates (Angstroms) |   |   |
|------------------|-------------------------|---|---|
|                  | X                       | Y | Z |

|    |           |           |           |
|----|-----------|-----------|-----------|
| 16 | 0.461010  | -0.116097 | 1.668663  |
| 6  | 1.372068  | -0.165819 | 0.221620  |
| 1  | 2.423352  | 0.009132  | 0.133831  |
| 6  | 0.311082  | 0.168106  | -0.770672 |
| 7  | -0.909068 | 0.233599  | 0.675628  |
| 6  | -0.866572 | -0.571439 | -0.518586 |
| 6  | -2.072970 | -0.695470 | -1.385346 |
| 1  | -1.847777 | -1.314171 | -2.246280 |
| 1  | -2.410770 | 0.275312  | -1.741115 |
| 1  | -2.885910 | -1.153758 | -0.836026 |
| 1  | 0.441221  | 0.917735  | -1.535508 |

Derivative.Coupling

|     |               |               |               |
|-----|---------------|---------------|---------------|
| -1  | 0.0081684591  | -0.0020044611 | -0.0060812511 |
| -2  | 0.0158774750  | -0.0138568891 | 0.0365607521  |
| -2  | 0.0005634909  | -0.0045702583 | -0.0014681057 |
| -4  | -0.0801350652 | 0.0178983312  | 0.0188993811  |
| -5  | 0.0408887290  | 0.0413099507  | -0.0183577571 |
| -6  | 0.0152862371  | -0.0469518235 | -0.0347101491 |
| -7  | 0.0023291149  | -0.0001595366 | -0.0002896617 |
| -8  | -0.0002259922 | -0.0000796171 | 0.0000405935  |
| -9  | -0.0006840508 | 0.0005488208  | -0.0003059272 |
| -10 | -0.0002315401 | -0.0001468844 | -0.0000053493 |
| -11 | -0.0018368577 | 0.0080123673  | 0.0057174745  |

Gradient.Difference

|     |               |               |               |
|-----|---------------|---------------|---------------|
| -1  | 0.0205064668  | -0.0334898987 | 0.0424744202  |
| -2  | 0.0015703130  | 0.0022967464  | -0.0187507420 |
| -3  | 0.0008496831  | 0.0045888287  | 0.0018206007  |
| -4  | 0.0250456859  | 0.0578372982  | 0.0375625333  |
| -5  | 0.0308646654  | 0.0548824238  | -0.1171533842 |
| -6  | -0.0696983195 | -0.1040782057 | 0.0395446824  |
| -7  | 0.0022200063  | 0.0097764041  | 0.0018326058  |
| -8  | 0.0004026849  | -0.0001017252 | 0.0000033350  |
| -9  | -0.0028937246 | 0.0015524337  | -0.0012752512 |
| -10 | 0.0005493611  | -0.0001338007 | 0.0000306457  |
| -11 | -0.0094168226 | 0.0068694954  | 0.0139105544  |
| -1  | 0.0205064668  | -0.0334898987 | 0.0424744202  |
| -2  | 0.0015703130  | 0.0022967464  | -0.0187507420 |
| -3  | 0.0008496831  | 0.0045888287  | 0.0018206007  |
| -4  | 0.0250456859  | 0.0578372982  | 0.0375625333  |
| -5  | 0.0308646654  | 0.0548824238  | -0.1171533842 |
| -6  | -0.0696983195 | -0.1040782057 | 0.0395446824  |
| -7  | 0.0022200063  | 0.0097764041  | 0.0018326058  |
| -8  | 0.0004026849  | -0.0001017252 | 0.0000033350  |
| -9  | -0.0028937246 | 0.0015524337  | -0.0012752512 |
| -10 | 0.0005493611  | -0.0001338007 | 0.0000306457  |
| -11 | -0.0094168226 | 0.0068694954  | 0.0139105544  |

Hartree Fock Energies = -606.2077217

MP2 Energies = -607.510863

## Pro-1

---

| Atomic<br>Number | Coordinates (Angstroms) |           |           |
|------------------|-------------------------|-----------|-----------|
|                  | X                       | Y         | Z         |
| 16               | -0.013255               | -0.149951 | 0.080561  |
| 6                | -0.112445               | -0.055836 | 1.840236  |
| 6                | 1.136769                | 0.069858  | 2.340467  |
| 1                | -1.045244               | -0.093118 | 2.362847  |
| 1                | 1.381302                | 0.150574  | 3.380435  |
| 7                | 2.159406                | 0.097250  | 1.411998  |
| 6                | 1.724292                | -0.000047 | 0.223612  |
| 6                | 2.604202                | -0.022466 | -0.990074 |
| 1                | 2.633738                | -1.017051 | -1.422491 |
| 1                | 3.606197                | 0.259203  | -0.698352 |
| 1                | 2.248345                | 0.662428  | -1.751125 |

---

Hartree Fock Energies = -606.44094117

MP2 Energies = -607.7278863

---

## 4-methylisothiazole (Rea-2)

---

| Atomic<br>Number | Coordinates (Angstroms) |           |           |
|------------------|-------------------------|-----------|-----------|
|                  | X                       | Y         | Z         |
| 16               | -0.098094               | 0.049277  | 1.512757  |
| 6                | 1.191003                | 0.085992  | 0.364524  |
| 1                | 2.214999                | 0.161818  | 0.670927  |
| 6                | 0.697648                | 0.006952  | -0.897675 |
| 7                | -1.282241               | -0.067279 | 0.348118  |
| 6                | -0.742983               | -0.080216 | -0.829691 |
| 1                | -1.383700               | -0.151438 | -1.691106 |
| 6                | 1.484228                | -0.004735 | -2.178625 |
| 1                | 1.419978                | -0.970438 | -2.668386 |
| 1                | 2.530168                | 0.206250  | -1.997953 |
| 1                | 1.111052                | 0.739810  | -2.873009 |

---

Hartree Fock Energies = -606.43657

MP2 Energies = -607.6832613

---

## CI-2-A

---

| Atomic<br>Number | Coordinates (Angstroms) |           |          |
|------------------|-------------------------|-----------|----------|
|                  | X                       | Y         | Z        |
| 7                | 0.109397                | -1.298837 | 0.100425 |

---

|    |           |           |           |
|----|-----------|-----------|-----------|
| 6  | -0.870966 | -0.500663 | -0.299741 |
| 16 | 1.204572  | -0.362753 | -1.068362 |
| 6  | -0.681626 | 0.929641  | 0.138156  |
| 6  | 0.535100  | 1.189567  | -0.339169 |
| 1  | -1.400665 | -0.681129 | -1.236087 |
| 1  | 1.122909  | 2.087518  | -0.303832 |
| 6  | -1.739123 | 1.808113  | 0.720346  |
| 1  | -2.503592 | 1.988993  | -0.032965 |
| 1  | -1.348143 | 2.768481  | 1.029397  |
| 1  | -2.229897 | 1.338532  | 1.564352  |

---

Derivative.Coupling

|     |               |               |               |
|-----|---------------|---------------|---------------|
| -1  | 0.0223245274  | -0.0060349581 | 0.0189251739  |
| -2  | -0.0461154519 | 0.0183362788  | 0.0035545342  |
| -3  | 0.0148215545  | -0.0082963901 | -0.0252697595 |
| -4  | -0.0005089053 | -0.0129179984 | -0.0042775129 |
| -5  | -0.0019149370 | -0.0070596010 | 0.0086491128  |
| -6  | 0.0153094457  | 0.0111454832  | 0.0012275660  |
| -7  | -0.0001705219 | 0.0014701146  | -0.0003080998 |
| -8  | -0.0029993069 | 0.0047031572  | -0.0016426822 |
| -9  | -0.0000212407 | -0.0003150868 | -0.0004392833 |
| -10 | -0.0008259907 | -0.0004996291 | -0.0001236778 |
| -11 | 0.0001008267  | -0.0005313703 | -0.0002953714 |

Gradient.Difference

|     |               |               |               |
|-----|---------------|---------------|---------------|
| -1  | 0.0068522220  | -0.0356401950 | -0.0352821348 |
| -2  | -0.0749871914 | 0.0243358617  | 0.0420908091  |
| -3  | 0.0656585547  | 0.0432248620  | 0.0257638442  |
| -4  | 0.0392007712  | -0.0063610796 | -0.0653286447 |
| -5  | -0.0208273114 | -0.0199430745 | 0.0181974119  |
| -6  | -0.0089923946 | -0.0071007209 | 0.0230726918  |
| -7  | 0.0000179035  | -0.0003143086 | -0.0000017211 |
| -8  | -0.0067441279 | 0.0038725724  | -0.0062313704 |
| -9  | 0.0000337712  | -0.0004884110 | -0.0011055358 |
| -10 | -0.0000683948 | -0.0010204506 | -0.0005242807 |
| -11 | -0.0001438027 | -0.0005650559 | -0.0006510695 |

Hartree Fock Energies = -606.2074039

MP2 Energies = -607.4554095

---

**Int-5**

---

| Atomic | Coordinates (Angstroms) |           |           |
|--------|-------------------------|-----------|-----------|
| Number | X                       | Y         | Z         |
| 6      | 0.000000                | 0.000000  | 0.000000  |
| 6      | 0.000000                | 0.000000  | 1.530220  |
| 6      | 1.314824                | 0.000000  | -0.217408 |
| 16     | 1.904293                | -0.039520 | 1.495807  |
| 7      | 0.529675                | 1.082105  | 2.144482  |
| 1      | 1.933972                | 0.070834  | -1.088335 |
| 6      | -1.187396               | 0.131738  | -0.897392 |
| 1      | -1.722568               | 1.051409  | -0.684650 |

---

|   |           |           |           |
|---|-----------|-----------|-----------|
| 1 | -0.891527 | 0.143845  | -1.939107 |
| 1 | -1.878322 | -0.692673 | -0.751377 |
| 1 | -0.486067 | -0.807886 | 2.067633  |

Hartree Fock Energies = -606.2706739

MP2 Energies = -607.5584267

-----  
**TS-5**  
 -----

| Atomic<br>Number | Coordinates (Angstroms) |           |           |
|------------------|-------------------------|-----------|-----------|
|                  | X                       | Y         | Z         |
| 6                | 0.000000                | 0.000000  | 0.000000  |
| 6                | 0.000000                | 0.000000  | 1.490485  |
| 6                | 1.462162                | 0.000000  | 1.512085  |
| 16               | 1.774687                | -0.481330 | -0.194189 |
| 1                | -0.458341               | 0.724744  | -0.648433 |
| 7                | 0.650843                | 1.229902  | 1.489485  |
| 1                | 2.112145                | -0.173806 | 2.348610  |
| 6                | -1.060378               | -0.469429 | 2.434798  |
| 1                | -0.759348               | -0.271071 | 3.456631  |
| 1                | -1.986775               | 0.065023  | 2.250852  |
| 1                | -1.245274               | -1.530721 | 2.317650  |

1

Frequencies -- -186.6819

Red. masses -- 7.8835

Frc consts -- 0.4265

IR Inten -- 0.0000

| Atom AN | X     | Y     | Z     |
|---------|-------|-------|-------|
| -1      | 0.25  | 0.54  | 0.27  |
| -2      | -0.02 | -0.20 | 0.12  |
| -3      | -0.02 | -0.04 | 0.02  |
| -4      | 0.02  | -0.03 | 0.00  |
| -5      | -0.30 | 0.02  | 0.14  |
| -6      | 0.13  | -0.15 | -0.47 |
| -7      | 0.01  | 0.20  | 0.05  |
| -8      | -0.07 | -0.07 | 0.11  |
| -9      | -0.08 | 0.00  | 0.10  |
| -10     | -0.02 | -0.01 | 0.04  |
| -11     | -0.03 | -0.06 | 0.01  |

Hartree Fock Energies = -606.2479881

MP2 Energies = -607.526432

---

**Int-6**

---

| Atomic | Coordinates (Angstroms) |           |           |
|--------|-------------------------|-----------|-----------|
| Number | X                       | Y         | Z         |
| 6      | 0.000000                | 0.000000  | 0.000000  |
| 6      | 0.000000                | 0.000000  | 1.465292  |
| 6      | 1.456450                | 0.000000  | 1.297720  |
| 16     | 1.586748                | -0.933307 | -0.255352 |
| 1      | -0.798921               | 0.185103  | -0.690219 |
| 7      | 0.626058                | 1.124926  | 0.832525  |
| 1      | 2.220336                | 0.143890  | 2.036447  |
| 6      | -0.993108               | -0.038854 | 2.575378  |
| 1      | -0.588483               | 0.444400  | 3.457022  |
| 1      | -1.897572               | 0.484764  | 2.287320  |
| 1      | -1.250591               | -1.060394 | 2.828563  |

---

Hartree Fock Energies = -606.3063101

MP2 Energies = -607.557932

---

--

**TS-6**

---

| Atomic | Coordinates (Angstroms) |           |          |
|--------|-------------------------|-----------|----------|
| Number | X                       | Y         | Z        |
| 16     | 0.000000                | 0.000000  | 0.000000 |
| 6      | 0.000000                | 0.000000  | 1.814132 |
| 1      | 1.002826                | 0.000000  | 2.209839 |
| 6      | -1.003544               | 0.005324  | 2.681343 |
| 7      | -2.236687               | -0.003098 | 2.035066 |
| 6      | -2.035076               | -0.006401 | 0.835718 |
| 1      | -2.773859               | -0.014965 | 0.057285 |
| 6      | -0.936767               | 0.006451  | 4.173280 |
| 1      | -1.427725               | -0.873556 | 4.574830 |
| 1      | 0.088722                | 0.015977  | 4.518097 |
| 1      | -1.443595               | 0.877591  | 4.574351 |

---

1

Frequencies -- --189.9222

Red. masses -- 3.7221

Frc consts -- 0.8034

IR Inten -- 0.0000

| Atom AN | X    | Y    | Z    |
|---------|------|------|------|
| -1      | 0.28 | 0.34 | 0.00 |

|     |       |       |       |
|-----|-------|-------|-------|
| -2  | 0.08  | -0.18 | 0.00  |
| -3  | -0.03 | -0.19 | 0.00  |
| -4  | -0.03 | -0.05 | 0.00  |
| -5  | -0.30 | -0.16 | 0.00  |
| -6  | -0.40 | -0.46 | 0.00  |
| -7  | -0.30 | -0.39 | -0.01 |
| -8  | -0.01 | 0.03  | 0.00  |
| -9  | -0.02 | 0.04  | 0.00  |
| -10 | 0.03  | 0.03  | 0.00  |
| -11 | -0.02 | 0.04  | 0.00  |

Hartree Fock Energies = -606.3612884

MP2 Energies = -607.6188083

### Pro-2

| Atomic<br>Number | Coordinates (Angstroms) |           |           |
|------------------|-------------------------|-----------|-----------|
|                  | X                       | Y         | Z         |
| 16               | 0.000000                | 0.000000  | 0.000000  |
| 6                | 0.000000                | 0.000000  | 1.735107  |
| 6                | 1.244755                | 0.000000  | 2.219483  |
| 1                | -0.916465               | 0.001223  | 2.287870  |
| 6                | 1.653783                | 0.001837  | 3.659200  |
| 7                | 2.256057                | -0.000109 | 1.253184  |
| 6                | 1.733081                | -0.000777 | 0.061082  |
| 1                | 2.324390                | 0.004108  | -0.833289 |
| 1                | 2.245196                | 0.882883  | 3.883613  |
| 1                | 2.264628                | -0.866591 | 3.879739  |
| 1                | 0.790989                | -0.008309 | 4.313336  |

Hartree Fock Energies = --606.452517

MP2 Energies = -607.7277401

### Int-7

| Atomic<br>Number | Coordinates (Angstroms) |           |           |
|------------------|-------------------------|-----------|-----------|
|                  | X                       | Y         | Z         |
| 16               | -0.089614               | -0.111615 | 1.509275  |
| 6                | 1.246139                | -0.254918 | 0.393237  |
| 1                | 2.220981                | 0.067220  | 0.710936  |
| 6                | 0.688164                | 0.029689  | -0.936875 |
| 7                | -1.329957               | 0.085922  | 0.417958  |
| 6                | -0.758854               | 0.142896  | -0.862709 |
| 1                | -1.419424               | 0.081581  | -1.698792 |
| 6                | 1.484722                | -0.008161 | -2.196958 |

|   |          |           |           |
|---|----------|-----------|-----------|
| 1 | 1.874785 | -1.006968 | -2.386610 |
| 1 | 2.339044 | 0.662511  | -2.137417 |
| 1 | 0.886074 | 0.287834  | -3.052162 |

Hartree Fock Energies = -606.224+D1108

MP2 Energies = -607.4693847

--

### TS-7

| Atomic<br>Number | Coordinates (Angstroms) |           |          |
|------------------|-------------------------|-----------|----------|
|                  | X                       | Y         | Z        |
| 16               | 0.000000                | 0.000000  | 0.000000 |
| 6                | 0.000000                | 0.000000  | 1.717022 |
| 1                | 0.965973                | 0.000000  | 2.192665 |
| 6                | -1.103646               | -0.042678 | 2.514973 |
| 7                | -2.832856               | 0.058192  | 0.790425 |
| 6                | -2.489611               | -0.008650 | 1.975714 |
| 1                | -3.289697               | -0.017895 | 2.711094 |
| 6                | -0.950661               | -0.110387 | 4.018744 |
| 1                | -0.399461               | -0.996719 | 4.311483 |
| 1                | -1.911867               | -0.151531 | 4.514737 |
| 1                | -0.421053               | 0.755310  | 4.399193 |

1

A

Frequencies -- -173.2358

Red. masses -- 7.6915

Frc consts -- 0.0665

IR Inten -- 0.0000

|     |       |       |       |
|-----|-------|-------|-------|
| -1  | 0.07  | -0.05 | 0.00  |
| -2  | 0.00  | 0.39  | 0.00  |
| -3  | -0.01 | 0.11  | 0.02  |
| -4  | -0.01 | 0.48  | -0.03 |
| -5  | -0.01 | 0.33  | 0.01  |
| -6  | -0.06 | -0.58 | 0.00  |
| -7  | -0.03 | -0.26 | 0.01  |
| -8  | -0.01 | 0.04  | 0.00  |
| -9  | -0.06 | -0.17 | -0.01 |
| -10 | -0.04 | 0.40  | -0.01 |
| -11 | -0.01 | 0.02  | -0.01 |

Hartree Fock Energies = -606.20359112

MP2 Energies = -607.4393847

### CI-2-B

Atomic

Coordinates (Angstroms)



| Number | X         | Y         | Z        |
|--------|-----------|-----------|----------|
| 16     | -0.036197 | 1.365744  | 0.885219 |
| 6      | 0.133967  | -0.448453 | 1.554265 |
| 1      | 1.120411  | -0.715773 | 1.893521 |
| 6      | -0.968155 | -0.307715 | 2.527423 |
| 7      | -2.127832 | 0.468435  | 1.813838 |
| 6      | -2.291982 | -0.721163 | 2.143893 |
| 1      | -3.087777 | -1.438858 | 2.169349 |
| 6      | -0.629664 | 0.058451  | 3.952052 |
| 1      | -0.340096 | -0.833139 | 4.500825 |
| 1      | -1.485039 | 0.499153  | 4.449202 |
| 1      | 0.184690  | 0.769671  | 3.987456 |

Derivative.Coupling

|     |               |               |               |
|-----|---------------|---------------|---------------|
| -1  | -0.0106415051 | 0.0050784046  | 0.0022561558  |
| -2  | 0.0043989080  | -0.0170293904 | -0.0026482516 |
| -3  | -0.0010091059 | 0.0029916963  | 0.0044331909  |
| -4  | 0.0009858006  | 0.0017406894  | -0.0024505356 |
| -5  | 0.0037850241  | 0.0064574610  | -0.0009145668 |
| -6  | 0.0019234445  | -0.0005668877 | -0.0000917846 |
| -7  | -0.0000066587 | 0.0005855168  | -0.0005099438 |
| -8  | 0.0008113463  | 0.0010995661  | -0.0000208859 |
| -9  | -0.0001536584 | -0.0000486961 | -0.0003161247 |
| -10 | -0.0001540245 | -0.0000247297 | 0.0000190499  |
| -11 | 0.0000604290  | -0.0002836303 | 0.0002436963  |

Gradient.Difference

|     |               |               |               |
|-----|---------------|---------------|---------------|
| -1  | -0.0288973129 | 0.0248519047  | 0.0104082625  |
| -2  | -0.0029628360 | -0.0459659912 | 0.0062469632  |
| -3  | 0.0003294207  | 0.0018745444  | 0.0018394437  |
| -4  | 0.0244072174  | 0.0028712123  | 0.0036380889  |
| -5  | 0.0050784386  | 0.0078141924  | -0.0240775664 |
| -6  | 0.0047775504  | 0.0059963129  | -0.0011172033 |
| -7  | -0.0006096861 | 0.0022059755  | 0.0030018443  |
| -8  | -0.0009671527 | 0.0008351681  | 0.0010534198  |
| -9  | -0.0005627227 | -0.0007153215 | -0.0006973730 |
| -10 | 0.0004130287  | 0.0004028438  | 0.0007312806  |
| -11 | -0.0010059455 | -0.0001708413 | -0.0010271604 |

Hartree Fock Energies = -606.2382353957

MP2 Energies = -607.4863219

**Int-8**

| Atomic<br>Number | Coordinates (Angstroms) |          |          |
|------------------|-------------------------|----------|----------|
|                  | X                       | Y        | Z        |
| 16               | 0.000000                | 0.000000 | 0.000000 |
| 6                | 0.000000                | 0.000000 | 1.624005 |
| 1                | 0.948533                | 0.000000 | 2.138886 |
| 6                | -1.195612               | 0.018117 | 2.512219 |
| 7                | -2.285742               | 1.011604 | 2.138456 |

|   |           |           |          |
|---|-----------|-----------|----------|
| 6 | -2.512516 | -0.194765 | 1.949704 |
| 1 | -3.275851 | -0.851368 | 1.584538 |
| 6 | -0.912635 | -0.156321 | 3.988989 |
| 1 | -1.831529 | -0.147233 | 4.560750 |
| 1 | -0.281433 | 0.646293  | 4.358080 |
| 1 | -0.405436 | -1.096797 | 4.181829 |

Hartree Fock Energies = -606.36582

MP2 Energies = -607.631414

### TS-8

| Atomic<br>Number | Coordinates (Angstroms) |   |   |
|------------------|-------------------------|---|---|
|                  | X                       | Y | Z |

|    |           |           |           |
|----|-----------|-----------|-----------|
| 16 | -1.825689 | -0.444276 | -0.001151 |
| 6  | -0.058981 | -0.856342 | 0.003254  |
| 1  | 0.098590  | -1.922831 | 0.007317  |
| 6  | 1.013523  | -0.076036 | -0.003068 |
| 7  | 0.664234  | 1.271694  | -0.000030 |
| 6  | -0.549563 | 1.347789  | 0.000984  |
| 1  | -1.139847 | 2.244103  | 0.005372  |
| 6  | 2.451292  | -0.479953 | -0.000367 |
| 1  | 2.952402  | -0.089904 | 0.879090  |
| 1  | 2.554171  | -1.556987 | -0.005882 |
| 1  | 2.958451  | -0.080580 | -0.872093 |

1

A

Frequencies -- -89.9222

Red. masses -- 7.6915

Frc consts -- 0.0665

IR Inten -- 0.0000

|     |       |       |       |
|-----|-------|-------|-------|
| -1  | 0.28  | 0.34  | 0.00  |
| -2  | 0.08  | -0.18 | 0.00  |
| -3  | -0.03 | -0.19 | 0.00  |
| -4  | -0.03 | -0.05 | 0.00  |
| -5  | -0.30 | -0.16 | 0.00  |
| -6  | -0.40 | -0.46 | 0.00  |
| -7  | -0.30 | -0.39 | -0.01 |
| -8  | -0.01 | 0.03  | 0.00  |
| -9  | -0.02 | 0.04  | 0.00  |
| -10 | 0.03  | 0.03  | 0.00  |
| -11 | -0.02 | 0.04  | 0.00  |

Hartree Fock Energies = -606.3612884

MP2 Energies = -607.6188083

### CI-2-C

| Atomic<br>Number        | Coordinates (Angstroms) |                |               |
|-------------------------|-------------------------|----------------|---------------|
|                         | X                       | Y              | Z             |
| 16                      | 0.106489                | 0.580884       | 1.412231      |
| 6                       | 1.210511                | -0.353822      | 0.490228      |
| 1                       | 2.263909                | -0.412758      | 0.674360      |
| 6                       | 0.561554                | -0.288169      | -0.853917     |
| 7                       | -0.811828               | 0.753765       | -0.050610     |
| 6                       | -0.838554               | -0.494052      | -0.743971     |
| 1                       | -1.501345               | -0.578329      | -1.585807     |
| 6                       | 1.353961                | 0.001045       | -2.091729     |
| 1                       | 2.052162                | -0.814020      | -2.266919     |
| 1                       | 1.932845                | 0.910766       | -1.981407     |
| 1                       | 0.716042                | 0.097273       | -2.960043     |
| Derivative.Coupling     |                         |                |               |
| -1                      | 0.0031036085            | -0.0097866393  | 0.0199395200  |
| -2                      | 0.0062665440            | 0.0001912451   | 0.0235628975  |
| -3                      | 0.0004052663            | -0.0012530092  | 0.0002177896  |
| -4                      | -0.0379521352           | 0.0521583937   | -0.0056883308 |
| -5                      | 0.0675659386            | 0.0032486343   | -0.0513338167 |
| -6                      | -0.0397641658           | -0.0574469126  | 0.0100308926  |
| -7                      | 0.0022960257            | 0.0017828261   | -0.0004373623 |
| -8                      | -0.0019562099           | 0.0131226713   | 0.0023119419  |
| -9                      | -0.0016069474           | -0.0014393531  | 0.0024425715  |
| -10                     | 0.0016376535            | -0.0002952955  | -0.0016266430 |
| -11                     | 0.0000044218            | -0.0002825607  | 0.0005805398  |
| Gradient.Difference     |                         |                |               |
| -1                      | -0.0141288398           | -0.0237089412  | 0.0337656679  |
| -2                      | 0.0360380727            | -0.0132667567  | -0.0506998379 |
| -3                      | 0.0025479519            | 0.0029638511   | -0.0031418920 |
| -4                      | -0.0503431875           | 0.0217865067   | -0.0386032248 |
| -5                      | -0.0000411734           | 0.0059662223   | -0.0007935087 |
| -6                      | -0.0430729052           | -0.0133087090  | 0.0903200272  |
| -7                      | 0.0508354303            | 0.0396090641   | -0.0137012460 |
| -8                      | 0.0027063731            | -0.0043864403  | -0.0122908012 |
| -9                      | 0.0220604363            | -0.0172385333  | -0.0085737466 |
| -10                     | -0.0066021585           | 0.0015837365   | 0.0037185620  |
| Hartree Fock Energies = |                         | -606.241228435 |               |
| MP2 Energies =          |                         | -607.4914385   |               |

### 5-methylisothiazole (Rea-3)

| Atomic<br>Number | Coordinates (Angstroms) |   |   |
|------------------|-------------------------|---|---|
|                  | X                       | Y | Z |

|    |           |           |           |
|----|-----------|-----------|-----------|
| 16 | -0.120769 | 0.000053  | 1.428459  |
| 6  | 1.139912  | -0.000006 | 0.240997  |
| 6  | 2.599064  | -0.000004 | 0.605049  |
| 6  | 0.564747  | -0.000009 | -0.990972 |
| 7  | -1.358938 | -0.000040 | 0.318123  |
| 6  | -0.867966 | 0.000011  | -0.882836 |
| 1  | -1.543481 | 0.000026  | -1.718870 |
| 1  | 1.101345  | -0.000036 | -1.920414 |
| 1  | 2.742019  | -0.000043 | 1.678431  |
| 1  | 3.094061  | 0.877677  | 0.206365  |
| 1  | 3.094099  | -0.877629 | 0.206290  |

Hartree Fock Energies = -606.4334332

MP2 Energies = -607.6728378

### CI-3-A

| Atomic<br>Number | Coordinates (Angstroms) |           |           |
|------------------|-------------------------|-----------|-----------|
|                  | X                       | Y         | Z         |
| 7                | -1.113751               | -1.554550 | 0.078114  |
| 6                | -0.693266               | -0.507087 | -0.753713 |
| 16               | 1.150052                | -0.325861 | -0.600486 |
| 6                | -0.838457               | 0.868724  | -0.123695 |
| 6                | 0.446160                | 1.176870  | 0.084376  |
| 1                | -0.999502               | -0.588979 | -1.789941 |
| 6                | 1.178044                | 2.325099  | 0.687680  |
| 1                | -1.743755               | 1.388687  | 0.126166  |
| 1                | 1.851675                | 2.776554  | -0.032506 |
| 1                | 1.768125                | 1.998331  | 1.536905  |
| 1                | 0.480309                | 3.082374  | 1.025324  |

#### Derivative.Coupling

|     |               |               |               |
|-----|---------------|---------------|---------------|
| -1  | 0.0005630029  | 0.0012591380  | 0.0014648463  |
| -2  | -0.0004759385 | -0.0017552069 | -0.0021937780 |
| -3  | -0.0006242183 | 0.0000901783  | 0.0000967466  |
| -4  | -0.0003991374 | -0.0000655960 | 0.0007314564  |
| -5  | 0.0001445030  | -0.0003345254 | 0.0001464750  |
| -6  | 0.0007944053  | 0.0009097715  | -0.0001866503 |
| -7  | -0.0000104580 | 0.0000372640  | -0.0000443210 |
| -8  | 0.0000653950  | -0.0000997586 | -0.0000122182 |
| -9  | -0.0000153819 | -0.0000016254 | 0.0000012247  |
| -10 | -0.0000324423 | -0.0000405522 | -0.0000072465 |
| -11 | -0.0000097299 | 0.0000009127  | 0.0000034650  |

#### Gradient.Difference

|    |               |               |               |
|----|---------------|---------------|---------------|
| -1 | -0.0036086154 | 0.0041959266  | -0.0015086848 |
| -2 | 0.0001441418  | -0.0050986359 | 0.0011373752  |
| -3 | 0.0045276501  | 0.0031959255  | -0.0013015743 |
| -4 | -0.0013034310 | -0.0007570257 | 0.0016865405  |
| -5 | 0.0012035100  | -0.0017111087 | -0.0000604341 |

|     |               |               |               |
|-----|---------------|---------------|---------------|
| -6  | -0.0002546684 | -0.0000731664 | 0.0005173060  |
| -7  | -0.0005724140 | 0.0004632679  | -0.0002173722 |
| -8  | -0.0001001395 | -0.0001033487 | -0.0002123487 |
| -9  | -0.0000118944 | -0.0001025874 | -0.0000145043 |
| -10 | -0.0000824755 | -0.0001474207 | -0.0001109150 |
| -11 | 0.0000583362  | 0.0001381735  | 0.0000846117  |

Hartree Fock Energies = -606.1977846

MP2 Energies = -607.4533379

### Int-9

| Atomic<br>Number | Coordinates (Angstroms) |           |           |
|------------------|-------------------------|-----------|-----------|
|                  | X                       | Y         | Z         |
| 6                | 0.000000                | 0.000000  | 0.000000  |
| 6                | 0.000000                | 0.000000  | 1.522888  |
| 6                | 1.309530                | 0.000000  | -0.247312 |
| 16               | 1.912898                | -0.061430 | 1.472697  |
| 7                | 0.549441                | 1.066862  | 2.141915  |
| 1                | -0.485952               | -0.807837 | 2.058923  |
| 1                | -0.838681               | 0.105696  | -0.661281 |
| 6                | 2.170043                | 0.074816  | -1.461587 |
| 1                | 2.838186                | -0.777160 | -1.523732 |
| 1                | 1.558479                | 0.091207  | -2.355725 |
| 1                | 2.776990                | 0.973609  | -1.441126 |

Hartree Fock Energies = -606.27221

MP2 Energies = -607.5533122

### TS-9

| Atomic<br>Number | Coordinates (Angstroms) |           |           |
|------------------|-------------------------|-----------|-----------|
|                  | X                       | Y         | Z         |
| 7                | 0.000000                | 0.000000  | 0.000000  |
| 16               | 0.000000                | 0.000000  | 1.698105  |
| 6                | 1.954107                | 0.000000  | 1.956882  |
| 6                | 2.032564                | -1.035408 | 1.079714  |
| 6                | 0.701310                | -1.216664 | 0.355686  |
| 6                | 3.056337                | 0.425584  | 2.879886  |
| 1                | 2.848612                | -1.746946 | 1.016376  |
| 1                | 0.327103                | -2.151600 | -0.025381 |
| 1                | 2.757603                | 0.316416  | 3.920309  |
| 1                | 3.973931                | -0.144982 | 2.747192  |
| 1                | 3.304343                | 1.473558  | 2.743274  |

1  
A  
Frequencies -- -113.9180  
Red. masses -- 4.0007  
Frc consts -- 0.2548

|          |       |        |       |
|----------|-------|--------|-------|
| IR Inten | --    | 0.0000 |       |
| -1       | -0.07 | -0.03  | 0.01  |
| -2       | 0.12  | -0.05  | 0.03  |
| -3       | -0.02 | 0.18   | -0.08 |
| -4       | -0.18 | -0.01  | 0.07  |
| -5       | 0.04  | 0.04   | -0.16 |
| -6       | -0.04 | -0.01  | 0.03  |
| -7       | -0.39 | -0.28  | 0.45  |
| -8       | 0.05  | 0.00   | -0.06 |
| -9       | -0.24 | 0.25   | 0.00  |
| -10      | -0.20 | -0.31  | 0.27  |
| -11      | 0.30  | -0.11  | -0.10 |

Hartree Fock Energies = -606.29406846

MP2 Energies = -607.5287031

---

### Int-10

---

| Atomic<br>Number | Coordinates (Angstroms) |           |           |
|------------------|-------------------------|-----------|-----------|
|                  | X                       | Y         | Z         |
| 6                | 0.000000                | 0.000000  | 0.000000  |
| 6                | 0.000000                | 0.000000  | 1.466092  |
| 6                | 1.454113                | 0.000000  | 1.324049  |
| 16               | 1.565238                | -0.910550 | -0.236910 |
| 1                | -0.718665               | -0.017040 | 2.259738  |
| 7                | 0.584930                | 1.151948  | 0.826748  |
| 1                | 2.210741                | 0.155028  | 2.066631  |
| 6                | -1.119098               | 0.199593  | -0.966267 |
| 1                | -1.604382               | -0.743140 | -1.190942 |
| 1                | -1.853928               | 0.873289  | -0.539813 |
| 1                | -0.753237               | 0.632576  | -1.888847 |

---

Hartree Fock Energies = -606.3157116

MP2 Energies = -607.5990554

---

### TS-10

---

| Atomic<br>Number | Coordinates (Angstroms) |           |           |
|------------------|-------------------------|-----------|-----------|
|                  | X                       | Y         | Z         |
| 16               | 0.000000                | 0.000000  | 0.000000  |
| 6                | 0.000000                | 0.000000  | 1.722796  |
| 6                | 1.368780                | 0.000000  | 2.103113  |
| 6                | -1.022069               | 0.754710  | 2.520952  |
| 1                | 1.688513                | 0.457132  | 3.019797  |
| 6                | 1.556802                | 0.853324  | 0.285189  |
| 7                | 2.178896                | -1.014602 | 1.770797  |
| 1                | 2.334322                | 0.276321  | -0.223033 |
| 1                | -1.084170               | 1.792488  | 2.209597  |
| 1                | -0.799472               | 0.713158  | 3.580439  |
| 1                | -2.000099               | 0.310858  | 2.367229  |

S22

```

-----
              1
              A
Frequencies -- -1097.4349
Red. masses  --   9.9430
Frc consts   --   0.2548
IR Inten     --   0.0000
  -1         -0.01  -0.04  -0.03
  -2          0.19   0.19   0.03
  -3         -0.21  -0.31   0.46
  -4          0.02   0.01   0.00
  -5         -0.11  -0.34   0.42
  -6          0.01   0.21  -0.36
  -7          0.03   0.06  -0.07
  -8         -0.10  -0.21  -0.07
  -9         -0.08  -0.02  -0.03
  -10        -0.01   0.03   0.00
  -11        0.08  -0.10  -0.04
Hartree Fock Energies = -606.2902766
MP2 Energies = -607.5414563
-----

```

### Int-11

```

-----
              Atomic              Coordinates (Angstroms)
              Number              X              Y              Z
-----
              16              0.061966  -0.014480  0.118191
              7              0.013884  -0.065196  1.774642
              6              1.337804  -0.095617  2.236792
              1              1.494524  -0.315156  3.273364
              6              1.807108  -0.132906  -0.140941
              6              2.372628  -0.097455  1.220260
              1              3.421268  -0.130062  1.434960
              6              2.434999   0.555062  -1.317632
              1              3.453309   0.208447  -1.454194
              1              2.462595   1.635371  -1.184742
              1              1.891954   0.346208  -2.232431
-----

```

```

Hartree Fock Energies = -606.22425
MP2 Energies = -607.4840608
-----

```

### TS-11

```

-----
              Atomic              Coordinates (Angstroms)
              Number              X              Y              Z
-----
              16              0.000000  0.000000  0.000000
              7              0.000000  0.000000  2.253609
              6              1.227243  0.000000  2.457105
              1              1.595230  0.027124  3.477215
              6              1.708183  -0.002435  -0.070340
-----

```

|   |          |           |           |
|---|----------|-----------|-----------|
| 6 | 2.145556 | -0.007782 | 1.320292  |
| 1 | 3.207852 | -0.024470 | 1.484771  |
| 6 | 2.706731 | -0.017365 | -1.200223 |
| 1 | 2.582956 | -0.903880 | -1.809949 |
| 1 | 3.720390 | -0.003902 | -0.819682 |
| 1 | 2.573599 | 0.843821  | -1.843208 |

-----

1  
A  
Frequencies -- -168.5835  
Red. masses -- 11.0167  
Frc consts -- 0.0382  
IR Inten -- 0.0000

| Atom AN | X     | Y     | Z     |
|---------|-------|-------|-------|
| -1      | 0.02  | -0.02 | 0.00  |
| -2      | -0.03 | 0.03  | -0.08 |
| -3      | -0.06 | -0.03 | -0.02 |
| -4      | -0.21 | 0.33  | -0.18 |
| -5      | -0.20 | -0.23 | -0.06 |
| -6      | 0.34  | -0.01 | 0.24  |
| -7      | 0.10  | -0.05 | 0.10  |
| -8      | -0.04 | -0.24 | 0.20  |
| -9      | 0.08  | -0.07 | 0.10  |
| -10     | -0.01 | 0.02  | -0.01 |
| -11     | -0.16 | 0.05  | -0.02 |

Hartree Fock Energies = -606.2076883

MP2 Energies = -607.4243268

-----

### CI-3-B

-----

| Atomic Number | Coordinates (Angstroms) |           |          |
|---------------|-------------------------|-----------|----------|
|               | X                       | Y         | Z        |
| 16            | -0.798907               | 0.046686  | 0.424071 |
| 6             | 0.205353                | 0.689216  | 1.940837 |
| 6             | 1.449590                | -0.099113 | 2.183628 |
| 6             | -0.891731               | 0.659134  | 2.927631 |
| 7             | -2.241111               | 1.042944  | 2.386528 |
| 6             | -2.038576               | -0.181823 | 2.608318 |
| 1             | -2.613095               | -1.081122 | 2.688499 |
| 1             | -0.686930               | 0.971398  | 3.938838 |
| 1             | 1.910537                | 0.201766  | 3.119710 |
| 1             | 2.179136                | 0.063245  | 1.397235 |
| 1             | 1.232713                | -1.165950 | 2.227144 |

-----



Derivative.Coupling

|     |               |               |               |
|-----|---------------|---------------|---------------|
| -1  | 0.0225249043  | 0.0082924191  | -0.0026069813 |
| -2  | -0.0175312675 | -0.0183777633 | -0.0211869606 |
| -3  | 0.0044493750  | 0.0024661985  | 0.0009218763  |
| -4  | -0.0034924048 | 0.0021539653  | 0.0040279261  |
| -5  | -0.0020967351 | -0.0042280255 | 0.0077687034  |
| -6  | -0.0047105933 | 0.0100528895  | 0.0109352112  |
| -7  | 0.0013604549  | -0.0012842813 | -0.0010827281 |
| -8  | -0.0000995784 | 0.0001340843  | 0.0000809183  |
| -9  | 0.0002376070  | -0.0003079544 | 0.0004689790  |
| -10 | -0.0006432984 | -0.0002587586 | 0.0003312337  |
| -11 | 0.0000015365  | 0.0013572265  | 0.0003418222  |

Gradient.Difference

|     |               |               |               |
|-----|---------------|---------------|---------------|
| -1  | -0.0130258416 | 0.0045751240  | 0.0094349447  |
| -2  | 0.0186442955  | 0.0084261759  | 0.0029048793  |
| -3  | -0.0073789181 | -0.0037796965 | 0.0035975925  |
| -4  | 0.0032759703  | 0.0034381648  | -0.0074181645 |
| -5  | -0.0046050935 | 0.0050257142  | -0.0071103692 |
| -6  | 0.0061326298  | -0.0181693257 | -0.0054895610 |
| -7  | -0.0020143006 | 0.0007427148  | 0.0044298515  |
| -8  | -0.0006954852 | 0.0007616760  | -0.0002420696 |
| -9  | 0.0010847190  | 0.0003924490  | 0.0004783833  |
| -10 | -0.0004078115 | 0.0002436671  | 0.0008157935  |
| -11 | -0.0010101642 | -0.0016566636 | -0.0014012805 |

Hartree Fock Energies = -606.2480603

MP2 Energies = -607.5043702

---

**Int-12**

---

| Atomic<br>Number | Coordinates (Angstroms) |           |          |
|------------------|-------------------------|-----------|----------|
|                  | X                       | Y         | Z        |
| 16               | -0.798907               | 0.046686  | 0.424071 |
| 6                | 0.205353                | 0.689216  | 1.940837 |
| 6                | 1.449590                | -0.099113 | 2.183628 |
| 6                | -0.891731               | 0.659134  | 2.927631 |
| 7                | -2.241111               | 1.042944  | 2.386528 |
| 6                | -2.038576               | -0.181823 | 2.608318 |
| 1                | -2.613095               | -1.081122 | 2.688499 |
| 1                | -0.686930               | 0.971398  | 3.938838 |
| 1                | 1.910537                | 0.201766  | 3.119710 |
| 1                | 2.179136                | 0.063245  | 1.397235 |
| 1                | 1.232713                | -1.165950 | 2.227144 |

---

Hartree Fock Energies = -606.36849

MP2 Energies = -607.6345502

---

**TS-12**

---

| Atomic<br>Number | Coordinates (Angstroms) |   |   |
|------------------|-------------------------|---|---|
|                  | X                       | Y | Z |

---

|    |          |           |           |
|----|----------|-----------|-----------|
| 16 | 0.000000 | 0.000000  | 0.000000  |
| 7  | 0.000000 | 0.000000  | 2.253609  |
| 6  | 1.227243 | 0.000000  | 2.457105  |
| 1  | 1.595230 | 0.027124  | 3.477215  |
| 6  | 1.708183 | -0.002435 | -0.070340 |
| 6  | 2.145556 | -0.007782 | 1.320292  |
| 1  | 3.207852 | -0.024470 | 1.484771  |
| 6  | 2.706731 | -0.017365 | -1.200223 |
| 1  | 2.582956 | -0.903880 | -1.809949 |
| 1  | 3.720390 | -0.003902 | -0.819682 |
| 1  | 2.573599 | 0.843821  | -1.843208 |

---

1  
A

Frequencies -- -168.5835  
Red. masses -- 11.0167  
Frc consts -- 0.0382  
IR Inten -- 0.0000

| Atom AN | X     | Y     | Z     |
|---------|-------|-------|-------|
| -1      | 0.02  | -0.02 | 0.00  |
| -2      | -0.03 | 0.03  | -0.08 |
| -3      | -0.06 | -0.03 | -0.02 |
| -4      | -0.21 | 0.33  | -0.18 |
| -5      | -0.20 | -0.23 | -0.06 |
| -6      | 0.34  | -0.01 | 0.24  |
| -7      | 0.10  | -0.05 | 0.10  |
| -8      | -0.04 | -0.24 | 0.20  |
| -9      | 0.08  | -0.07 | 0.10  |
| -10     | -0.01 | 0.02  | -0.01 |
| -11     | -0.16 | 0.05  | -0.02 |

Hartree Fock Energies = -606.2076883

MP2 Energies = -607.4243268

---

**CI-3-C**

---

|   | Atomic Number | Coordinates (Angstroms) |            |   |
|---|---------------|-------------------------|------------|---|
|   |               | X                       | Y          | Z |
| 6 | 2.53943517    | 0.06296386              | 1.47388399 |   |
| 6 | 1.17816443    | 0.30940437              | 1.91409328 |   |
| 6 | 0.07314800    | 0.29824800              | 1.07481200 |   |
| 1 | 1.08825443    | 0.45704537              | 2.97840328 |   |
| 1 | -0.80169200   | 0.58955400              | 1.64182900 |   |

|    |             |             |             |
|----|-------------|-------------|-------------|
| 16 | 1.06871680  | 0.05755876  | -1.51544462 |
| 6  | -0.03300100 | -0.05780700 | -0.29908700 |
| 1  | 3.21824110  | -0.27619635 | 2.24033340  |
| 6  | -1.35118400 | -0.08704400 | -0.94570200 |
| 6  | -2.55147600 | -0.35205400 | -0.27708600 |
| 6  | -3.75013400 | -0.39314000 | -0.96525200 |
| 6  | -3.77583200 | -0.14373400 | -2.32970500 |
| 6  | -2.59745100 | 0.12208400  | -3.00913400 |
| 6  | -1.39490000 | 0.12639500  | -2.32498000 |
| 1  | -2.54773400 | -0.54790900 | 0.77977400  |
| 1  | -4.66306900 | -0.61208700 | -0.44079400 |
| 1  | -4.71047900 | -0.16552700 | -2.86142700 |
| 1  | -2.61514800 | 0.30715200  | -4.06811000 |
| 1  | -0.47181700 | 0.30155100  | -2.84613600 |

-----  
Derivative.Coupling

|     |               |               |               |
|-----|---------------|---------------|---------------|
| -1  | -0.0246967984 | 0.0158850843  | 0.0625683365  |
| -2  | -0.0116408539 | -0.0090099147 | -0.0598697420 |
| -3  | 0.0547842495  | -0.0044948845 | 0.0169057367  |
| -4  | -0.0004941651 | -0.0008817539 | -0.0077533578 |
| -5  | 0.0000553318  | -0.0043088158 | 0.0002679771  |
| -6  | 0.0021603923  | -0.0003592425 | -0.0148242559 |
| -7  | -0.0259784698 | 0.0031482695  | 0.0220516658  |
| -8  | 0.0003991612  | 0.0031516410  | 0.0006388459  |
| -9  | 0.0027564968  | -0.0032766864 | -0.0210974834 |
| -10 | 0.0039026445  | -0.0014353270 | 0.0026337290  |
| -11 | 0.0017541850  | 0.0026346603  | -0.0019960725 |
| -12 | -0.0010247150 | -0.0000265318 | -0.0009344947 |
| -13 | -0.0007014218 | -0.0013987908 | 0.0007038031  |
| -14 | -0.0016989549 | 0.0005629016  | 0.0017974440  |
| -15 | 0.0001651310  | -0.0008269073 | -0.0004594334 |
| -16 | 0.0003624622  | 0.0000935067  | 0.0003076520  |
| -17 | 0.0000571577  | -0.0000434781 | -0.0000229469 |
| -18 | 0.0000412309  | -0.0000268242 | -0.0000194734 |
| -19 | -0.0002030639 | 0.0006130935  | -0.0008979300 |

Gradient.Difference

|    |               |               |               |
|----|---------------|---------------|---------------|
| -1 | -0.0030925511 | -0.0526171809 | 0.0014928103  |
| -2 | 0.0123883600  | 0.0286907175  | 0.0041948971  |
| -3 | -0.0068435448 | 0.0128271439  | -0.0027081839 |
| -4 | -0.0035470402 | -0.0225536781 | 0.0060334945  |
| -5 | -0.0004832348 | -0.0002559451 | -0.0003360741 |

|                         |               |               |               |
|-------------------------|---------------|---------------|---------------|
| -6                      | -0.0094408400 | -0.0011892424 | 0.0033796404  |
| -7                      | 0.0063877682  | 0.0070574888  | -0.0030588281 |
| -8                      | -0.0013988727 | -0.0047112655 | -0.0010664250 |
| -9                      | 0.0029804494  | 0.0348801168  | -0.0094600145 |
| -10                     | 0.0040144353  | 0.0021192897  | 0.0050891086  |
| -11                     | 0.0026078957  | -0.0021831475 | -0.0042887070 |
| -12                     | -0.0028679629 | 0.0001342860  | -0.0002996784 |
| -13                     | 0.0006595267  | -0.0000647098 | 0.0025236518  |
| -14                     | -0.0012231593 | -0.0019199726 | -0.0011824050 |
| -15                     | -0.0005483758 | 0.0002433813  | 0.0003490370  |
| -16                     | 0.0003512122  | -0.0001960344 | 0.0003017639  |
| -17                     | 0.0000032312  | -0.0000512551 | 0.0000046717  |
| -18                     | 0.0001336644  | 0.0000870729  | -0.0000408295 |
| -19                     | -0.0000809615 | -0.0002970655 | -0.0009279296 |
| Hartree Fock Energies = |               |               | -780.75501    |
| MP2 Energies =          |               |               | -782.50942    |

---

### Pro-3

---

| Atomic<br>Number | Coordinates (Angstroms) |           |           |
|------------------|-------------------------|-----------|-----------|
|                  | X                       | Y         | Z         |
| 16               | 0.000000                | 0.000000  | 0.000000  |
| 6                | 0.000000                | 0.000000  | 1.744683  |
| 6                | 1.282889                | 0.000000  | 2.180617  |
| 6                | -1.261862               | -0.011667 | 2.553555  |
| 1                | 1.580078                | -0.001987 | 3.211074  |
| 7                | 2.269609                | 0.025738  | 1.207742  |
| 6                | 1.740622                | 0.026709  | 0.039521  |
| 1                | 2.314327                | 0.052146  | -0.865818 |
| 1                | -1.880081               | 0.852688  | 2.338760  |
| 1                | -1.022207               | 0.005270  | 3.609734  |
| 1                | -1.849901               | -0.901141 | 2.357394  |

---

|                         |  |              |
|-------------------------|--|--------------|
| Hartree Fock Energies = |  | -606.4449188 |
| MP2 Energies =          |  | -607.6914034 |

---
